# Supplementary material for: Phosphatidylserine colocalizes with epichromatin in interphase nuclei and mitotic chromosomes
Source: PubMed Central journal article supplement — Nucleus. 2012 Mar 1;3(2):200–10. doi: 10.4161/nucl.19662 (PMC3383575; doi:10.4161/nucl.19662), 2012-03-01
Supplement: nucl-3-200-s01.pdf [file nucl-3-200-s01.pdf]

**Supplemental Material to:**

Igor Prudovsky, Calvin P.H. Vary, Yolanda Maraki, Ada L. Olins and Donald E. Olins. Phosphatidylserine colocalizes with epichromatin in interphase nuclei and mitotic chromosomes. *Nucleus* 2012; 3(2):

<http://dx.doi.org/10.4161/nucl.3.2.19662>

<http://www.landesbioscience.com/journals/nucleus/article/19662>

## Supplementary Material

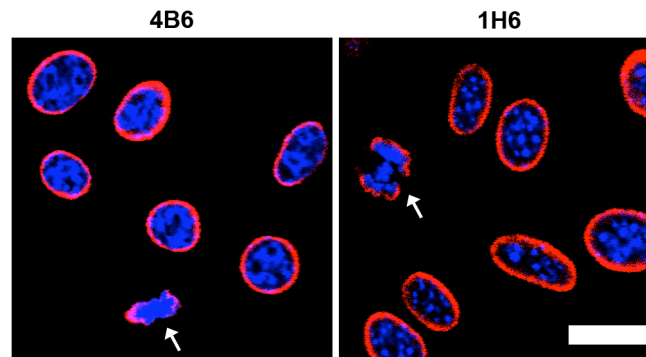

**Fig. S1.** Comparative confocal images of two mouse monoclonal anti-phosphatidylserine antibodies (Abcam #4B6 and Millipore #1H6) staining NIH 3T3 cells, following ethanol fixation. Color scheme: antibody staining (red); TOPRO-3 (blue). The arrows point to mitotic chromosomes. Scale bar: 20  $\mu\text{m}$ .

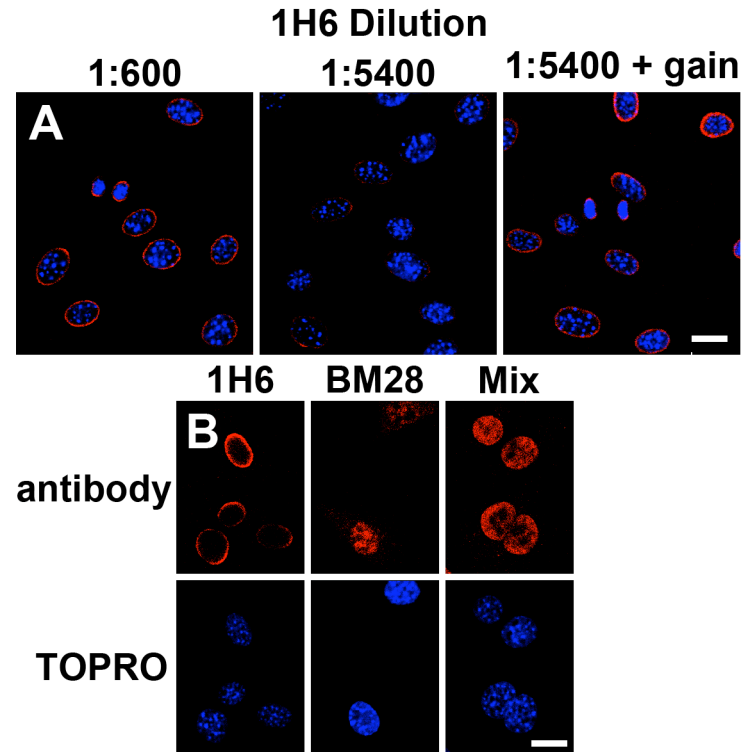

**Fig. S2.** Tests for possible immunostaining artifacts with anti-phosphatidylserine (1H6). **(A)** Image consistency during antibody dilution. Antibody 1H6 (red) gives peripheral staining at high dilutions (1:600 and 1:5400, with increased gain), compared to the routinely employed dilution (1:200). DNA (blue) stained with TOPRO-3. This experiment shows that a high concentration of 1H6 (1:200) does not form a physical barrier preventing 1H6 from diffusing into the nuclear interior, since a very high dilution (1:5400) yields an identical antibody distribution. **(B)** Absence of optical attenuation. Peripheral staining by 1H6 does not interfere with central nuclear staining by another mouse monoclonal anti-nuclear antibody (anti-BM28, an unrelated MCM nuclear protein). Both primary antibodies were reacted simultaneously, followed by a simultaneous reaction with the secondary anti-mouse IgG (red). DNA (blue) stained with TOPRO-3. Scale bars: 20  $\mu\text{m}$ .

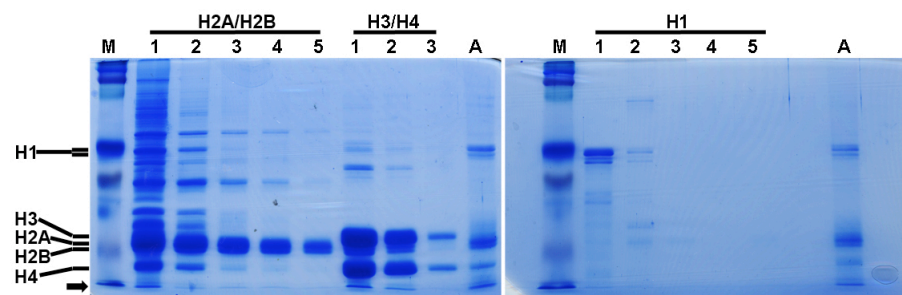

**Fig. S3.** Coomassie Blue stained 15% SDS-PAGE of NIH 3T3 histone subfractions (Active Motif kit) and HL-60/S4 total acid extracted histones (A). Arrow: dye front. M: MW markers. Loads: 5  $\mu$ l of each histone subfraction (plus 5  $\mu$ l of 2x SDS sample buffer); H2A+H2B, 5 sequential fractions; H3+H4, 3 sequential fractions; H1, 5 sequential fractions. The H1 fraction revealed no contamination by inner histones; H2A+H2B contained negligible amounts of H3+H4; H3+H4 showed <10% (by stain intensity) of contaminating H2A+H2B.

# Antibody 1H6

| Representative peptide, histone H2A: <b>VGAGAPVYMAAVLEYLTAEILELAGNAAR</b> |        |       |       |              |             |         |               |
|---------------------------------------------------------------------------|--------|-------|-------|--------------|-------------|---------|---------------|
| N                                                                         | Unused | Total | % Cov | Accession #  | Name        | Species | Peptides(95%) |
| 2                                                                         | 2.72   | 2.72  | 52.6  | Q64426_MOUSE | Histone H2A | MOUSE   | 2             |

| Histone H2A                   |           |           |
|-------------------------------|-----------|-----------|
| VGAGAPVYMAAVLEYLTAEILELAGNAAR |           |           |
| Residue                       | b         | y         |
| V                             | 100.0757  | 2933.5441 |
| G                             | 157.0972  | 2834.4757 |
| A                             | 228.1343  | 2777.4542 |
| G                             | 285.1557  | 2706.4171 |
| A                             | 356.1928  | 2649.3957 |
| P                             | 453.2456  | 2578.3585 |
| V                             | 552.3140  | 2481.3058 |
| Y                             | 715.3774  | 2382.2374 |
| M                             | 846.4178  | 2219.1740 |
| A                             | 917.4550  | 2088.1335 |
| A                             | 988.4921  | 2017.0964 |
| V                             | 1087.5605 | 1946.0593 |
| L                             | 1200.6445 | 1846.9909 |
| E                             | 1329.6871 | 1733.9068 |
| Y                             | 1492.7505 | 1604.8642 |
| L                             | 1605.8345 | 1441.8009 |
| T                             | 1706.8822 | 1328.7169 |
| A                             | 1777.9193 | 1227.6692 |
| E                             | 1906.9619 | 1156.6321 |
| I                             | 2020.0460 | 1027.5895 |
| L                             | 2133.1300 | 914.5054  |
| E                             | 2262.1726 | 801.4213  |
| L                             | 2375.2567 | 672.3787  |
| A                             | 2446.2938 | 559.2947  |
| G                             | 2503.3153 | 488.2576  |
| N                             | 2617.3582 | 431.2361  |
| A                             | 2688.3953 | 317.1932  |
| A                             | 2759.4324 | 246.1561  |
| R                             | 2915.5335 | 175.1190  |

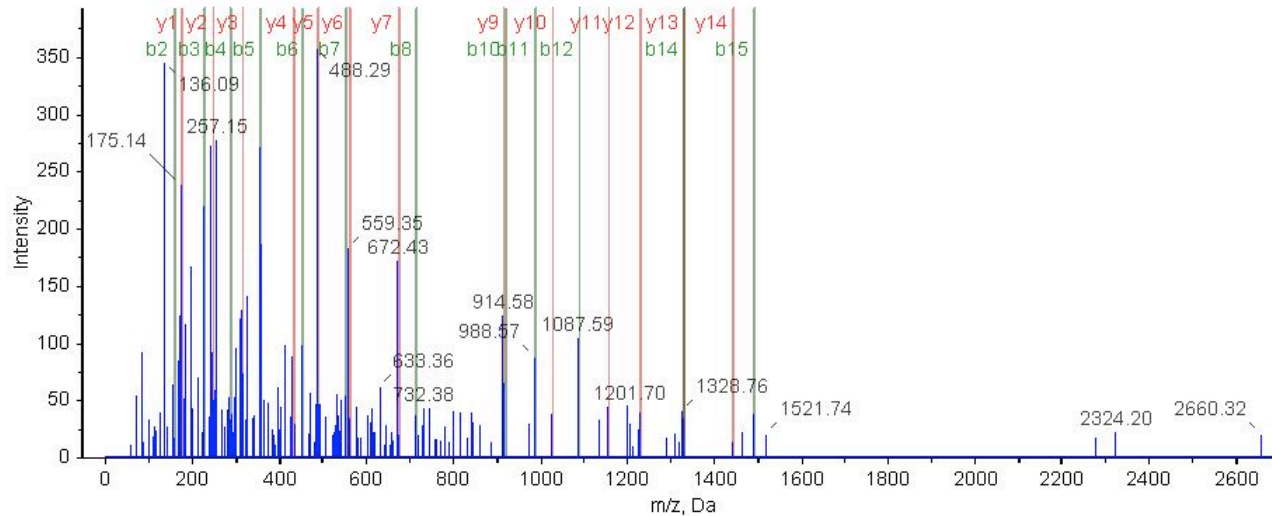

# Antibody 1H6

| Representative peptide, histone H2B: <b>KESYSVYVYK</b> |        |       |       |             |             |         |               |
|--------------------------------------------------------|--------|-------|-------|-------------|-------------|---------|---------------|
| N                                                      | Unused | Total | % Cov | Accession # | Name        | Species | Peptides(95%) |
| 3                                                      | 2.48   | 2.48  | 44.4  | H2B_MOUSE   | Histone H2B | MOUSE   | 2             |

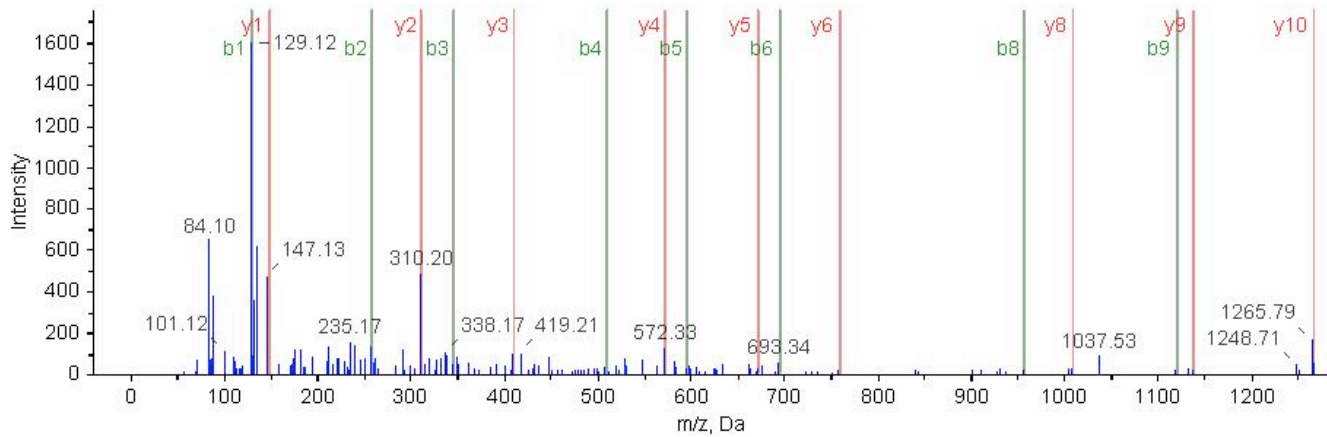

| Histone H2B       |           |           |
|-------------------|-----------|-----------|
| <b>KESYSVYVYK</b> |           |           |
| Residue           | b         | y         |
| K                 | 129.1022  | 1265.6412 |
| E                 | 258.1448  | 1137.5463 |
| S                 | 345.1769  | 1008.5037 |
| Y                 | 508.2402  | 921.4716  |
| S                 | 595.2722  | 758.4083  |
| V                 | 694.3406  | 671.3763  |
| Y                 | 857.4040  | 572.3079  |
| V                 | 956.4724  | 409.2445  |
| Y                 | 1119.5357 | 310.1761  |
| K                 | 1247.6307 | 147.1128  |

# Antibody PL2-6

| Representative peptide, Histone H2B: <b>AMGIMNSFVNDIFER</b> |        |       |       |              |             |         |               |
|-------------------------------------------------------------|--------|-------|-------|--------------|-------------|---------|---------------|
| N                                                           | Unused | Total | % Cov | Accession #  | Name        | Species | Peptides(95%) |
| 6                                                           | 6.20   | 6.20  | 64.3  | B2RVD5_MOUSE | Histone H2B | MOUSE   | 6             |

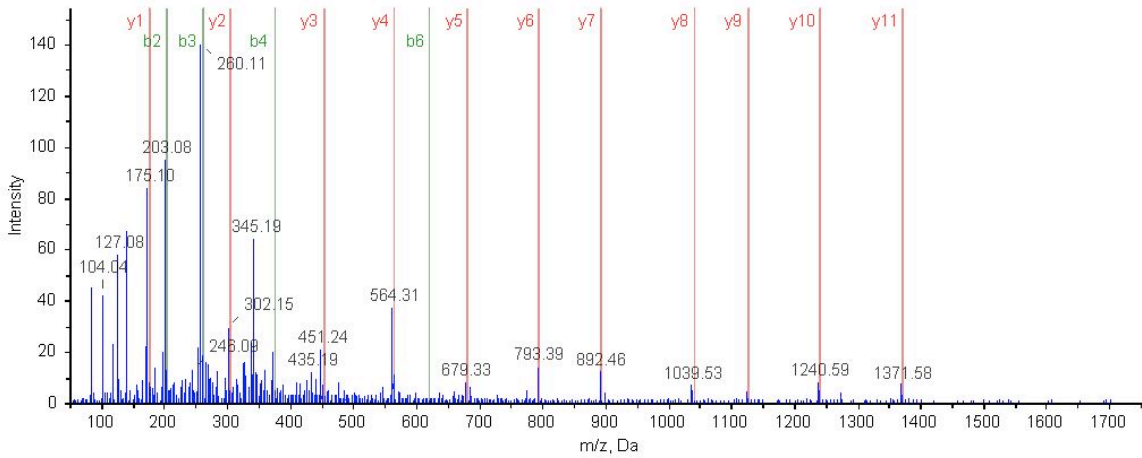

| Histone H2B     |           |           |
|-----------------|-----------|-----------|
| AMGIMNSFVNDIFER |           |           |
| Residue         | b         | y         |
| A               | 72.0444   | 1743.8193 |
| M               | 203.0849  | 1672.7822 |
| G               | 260.1063  | 1541.7417 |
| I               | 373.1904  | 1484.7202 |
| M               | 504.2309  | 1371.6362 |
| N               |           | 1240.5957 |
| S               | 705.3058  | 1126.5527 |
| F               | 852.3743  | 1039.5207 |
| V               | 951.4427  | 892.4523  |
| N               | 1065.4856 | 793.3839  |
| D               | 1180.5125 | 679.3410  |
| I               | 1293.5966 | 564.3140  |
| F               | 1440.6650 | 451.2300  |
| E               | 1569.7076 | 304.1615  |
| R               | 1725.8087 | 175.1190  |

# Antibody PL2-6

| Representative peptide, Histone H2A: <b>VGAGAPVYLAAVLEYLTAEILELAGNAAR</b> |        |       |       |              |             |         |               |
|---------------------------------------------------------------------------|--------|-------|-------|--------------|-------------|---------|---------------|
| N                                                                         | Unused | Total | % Cov | Accession #  | Name        | Species | Peptides(95%) |
| 12                                                                        | 2.92   | 3.67  | 53.9  | B2RVP5_MOUSE | Histone H2A | MOUSE   | 4             |

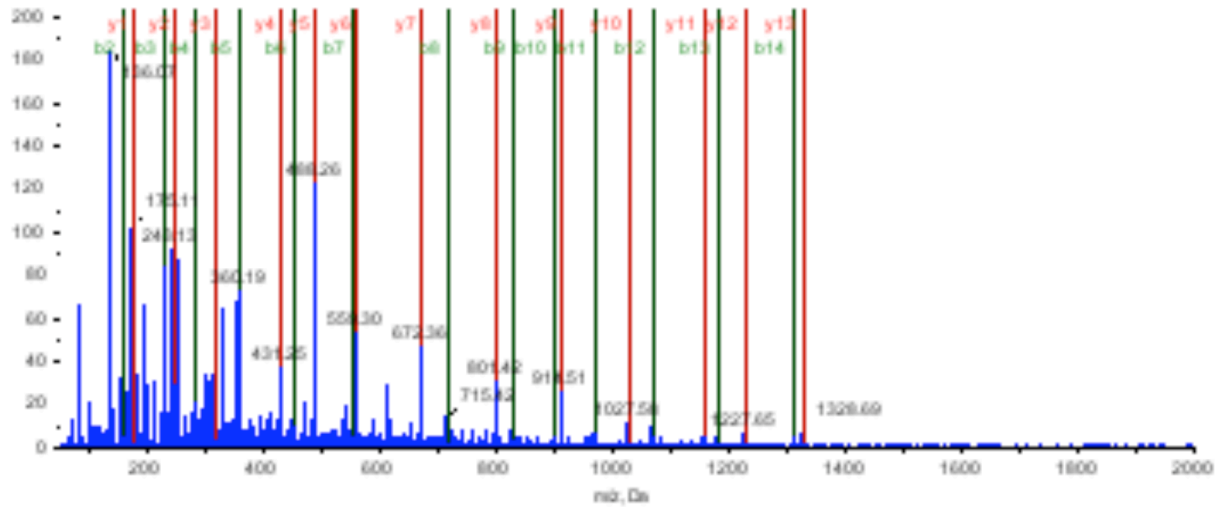

| Histone H2A                   |           |           |
|-------------------------------|-----------|-----------|
| VGAGAPVYLAAVLEYLTAEILELAGNAAR |           |           |
| Residue                       | b         | y         |
| V                             | 100.0757  | 2915.5877 |
| G                             | 157.0972  | 2816.5193 |
| A                             | 228.1343  | 2759.4978 |
| G                             | 285.1557  | 2688.4607 |
| A                             | 356.1928  | 2631.4392 |
| P                             | 453.2456  | 2560.4021 |
| V                             | 552.3140  | 2463.3494 |
| Y                             | 715.3774  | 2364.2809 |
| L                             | 828.4614  | 2201.2176 |
| A                             | 899.4985  | 2088.1335 |
| A                             | 970.5356  | 2017.0964 |
| V                             | 1069.6041 | 1946.0593 |
| L                             | 1182.6881 | 1846.9909 |
| E                             | 1311.7307 | 1733.9068 |
| Y                             | 1474.7940 | 1604.8642 |
| L                             | 1587.8781 | 1441.8009 |
| T                             | 1688.9258 | 1328.7169 |
| A                             | 1759.9629 | 1227.6692 |
| E                             | 1889.0055 | 1156.6321 |
| I                             | 2002.0896 | 1027.5895 |
| L                             | 2115.1736 | 914.5054  |
| E                             | 2244.2162 | 801.4213  |
| L                             | 2357.3003 | 672.3787  |
| A                             | 2428.3374 | 559.2947  |
| G                             | 2485.3589 | 488.2576  |
| N                             | 2599.4018 | 431.2361  |
| A                             | 2670.4389 | 317.1932  |
| A                             | 2741.4760 | 246.1561  |
| R                             | 2897.5771 | 175.1190  |



**Fig. S4.** Representative time of flight mass spectra (MS, left panels) and collision-induced sequence data for selected high confidence (>99%) MS peptides (right tables), for the two most prevalent peptides in the 1H6 and PL6-2 immunoprecipitation reactions. The MS/MS-associated ion tables list the sequence of the identified peptide. For clarity of reference to MS/MS data, only selected critical y+1 ion and b+1 ion series are shown (shaded cells). y+2 and b+2 ions were also used for peptide identification (data not shown). Also presented above each spectrum is the percent coverage of H2A or H2B, for all unique peptides identified in at least 3 independent mass spectrometry experiments. MS data: “m/z”, theoretical mass of the identified peptide; “z”, observed charge state for the identified peptide.
